# Supplementary material for: Controllable synthesis of conjugated thio-phenylethyne-based compounds with different chain lengths
Source: Royal Society of Chemistry journal article supplement (doi:10.1039/c6ra05709h), 2016-01-01
Supplement: c6ra05709h1.pdf [file c6ra05709h1.pdf]

## **Controllable Synthesis of Conjugated Thiophenylethyne-based Compounds with Different Chain Lengths**

Wei Huang, Haoyun Zhu, Yuli Huang, Junwei Yang and Weizhi Wang\*

*State Key Laboratory of Molecular Engineering of Polymers, Department of Macromolecular Science, Fudan University, Shanghai 200433, P. R. China. E-mail: weizhiwang@fudan.edu.cn; Tel: +86 021-65643836*

### **Supporting Information**

#### **Table of Content**

- 1. Summary of crystal data and reflective collection parameters for 2. (Table S1)**
- 2.  $^1\text{H}$  NMR and  $^{13}\text{C}$  NMR spectra of the synthesized products. (Fig. S1 – Fig. S9)**
- 3. The MALDI-TOF of 1-4. (Fig. S10 – Fig. S13)**
- 4. The GPC data of PTE. (Fig. S14)**
- 5. The fluorescence lifetime of 1-4 and PTE in  $\text{CH}_2\text{Cl}_2$  solutions. (Fig. S15)**
- 6. The CV curves of 1-4 and PTE in  $\text{CH}_2\text{Cl}_2$  solution. (Fig. S16)**
- 7. The 2D-GIXRD patterns of 1, 2 and 4. The inserted models are schematic diagram of the orientations of the aggregation structure with respect to the substrate in the films. (Fig. S17 – Fig. S19)**
- 8. The detailed calculated procedures for the charge carrier mobility.**
- 9. The charge carrier mobility plots versus gate voltages for 3, 4 and PTE. (Fig. S20)**

**Table S1** Summary of crystal data and reflective collection parameters for **2**.

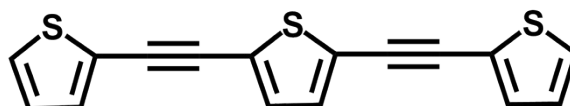

---

|                                                 |                                               |
|-------------------------------------------------|-----------------------------------------------|
| Empirical formula                               | C <sub>16</sub> H <sub>8</sub> S <sub>3</sub> |
| Formula weight                                  | 296.40                                        |
| Crystal size, mm                                | 0.26 x 0.21 x 0.17                            |
| Crystal system                                  | Monoclinic, C2/c                              |
| space group                                     | P2(1)/c                                       |
| a, Å                                            | 15.042(5)                                     |
| b, Å                                            | 11.404(4)                                     |
| c, Å                                            | c = 32.856(10)                                |
| a, deg                                          | 90                                            |
| β, deg                                          | 95.094(5)                                     |
| γ, deg                                          | 90                                            |
| V, Å <sup>3</sup>                               | 5614(3)                                       |
| Z                                               | 16                                            |
| Calculated density, Mg/m <sup>3</sup>           | 1.403                                         |
| F(000)                                          | 2432                                          |
| Temperature, K                                  | 296(2)                                        |
| Wavelength, Å                                   | 0.71073                                       |
| μ(Mo Ka), mm <sup>-1</sup>                      | 0.509                                         |
| 2θ <sub>max</sub> , deg (Completeness )         | 25.00 (98.5 %)                                |
| no. of collected reflections                    | 13829                                         |
| no. of unique ref.(R <sub>int</sub> )           | 4882 (0.0618)                                 |
| Data/restraints/parameters                      | 4882 / 7 / 352                                |
| R <sub>1</sub> , wR <sub>2</sub> [obs I>2σ (I)] | 0.0881, 0.1980                                |
| R <sub>1</sub> , wR <sub>2</sub> (all data)     | 0.1181, 0.2094                                |
| residual peak/hole, e. Å <sup>-3</sup>          | 0.634 / -0.752                                |
| transmission ratio                              | 0.9185/ 0.8791                                |
| Goodness-of-fit on F <sup>2</sup>               | 1.067                                         |

---

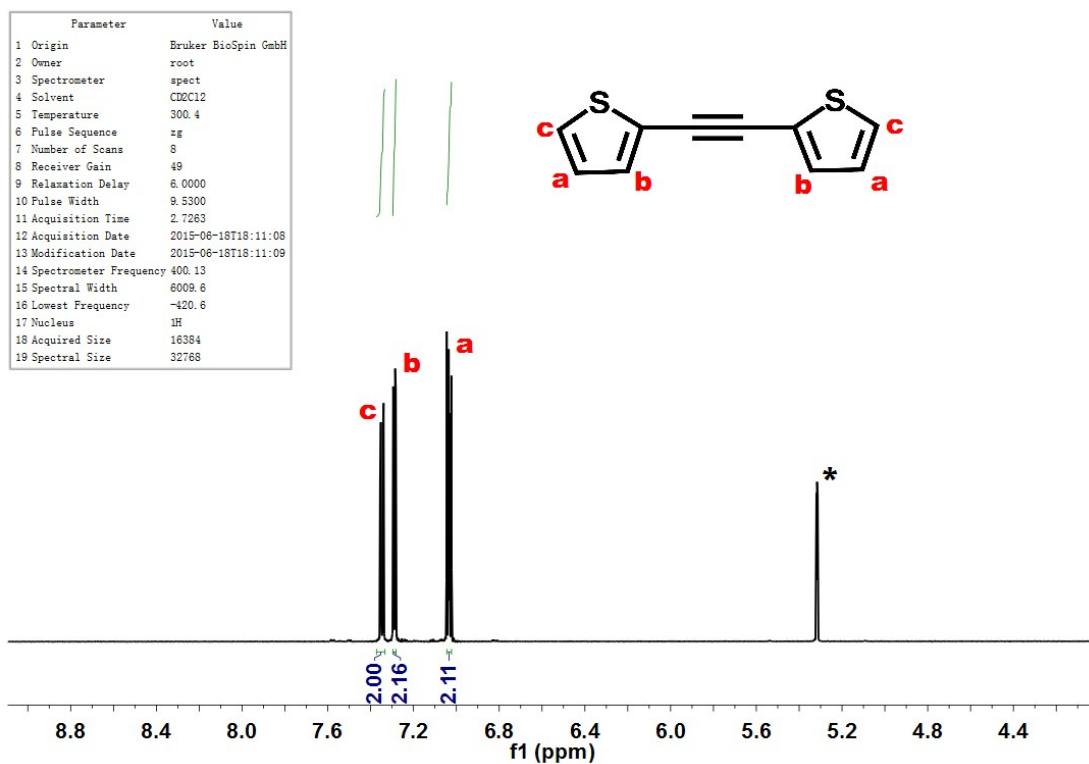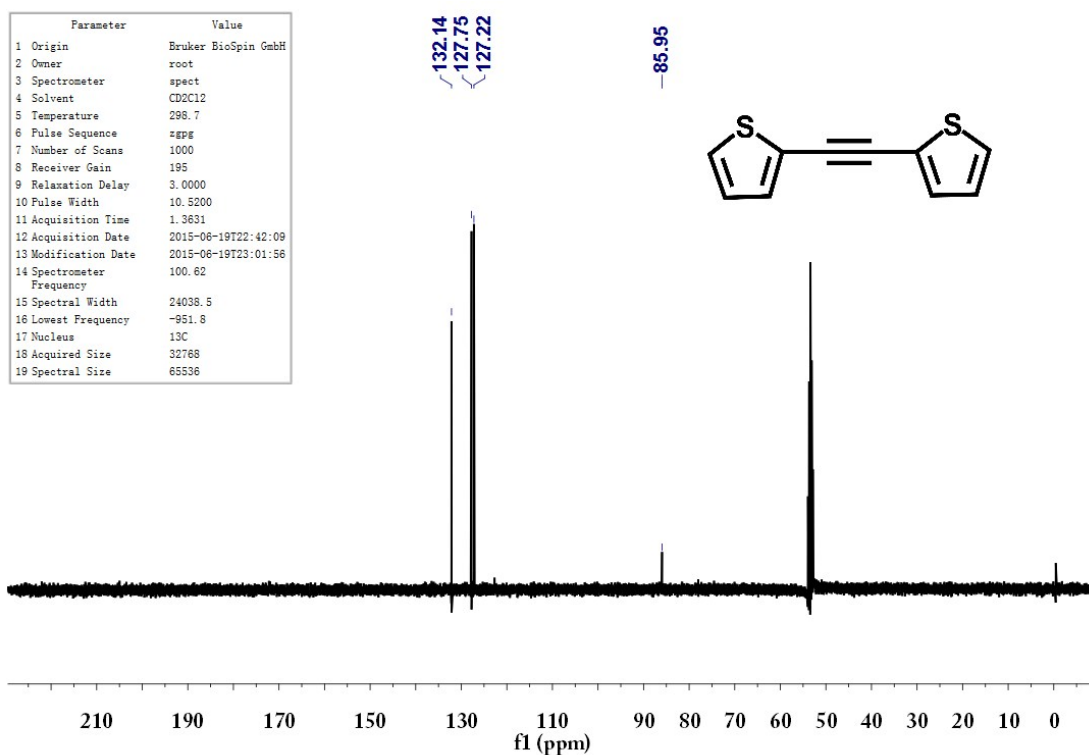

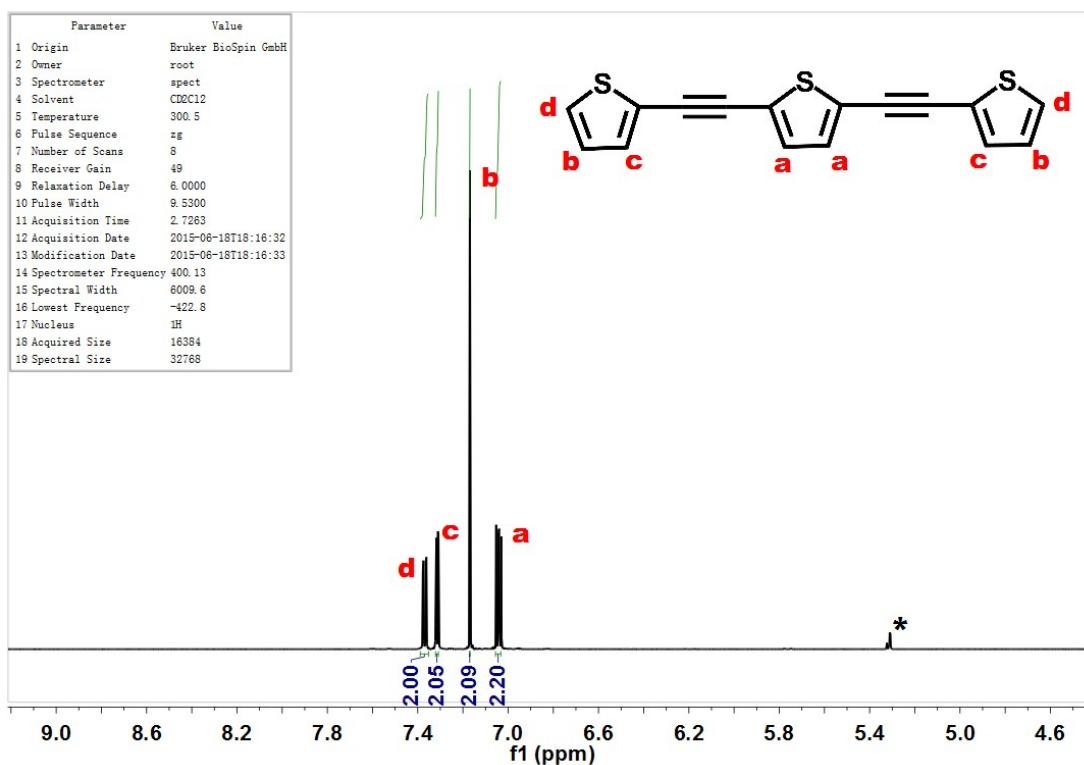

Fig. S3 The <sup>1</sup>H NMR spectrum of 2.

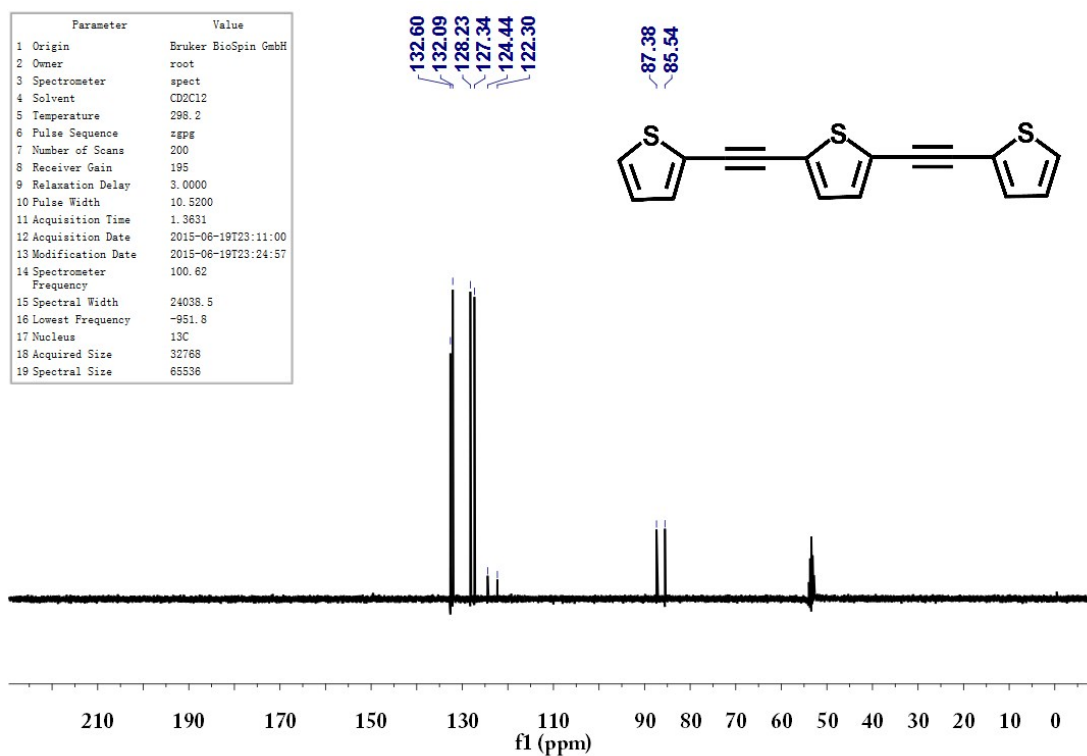

Fig. S4 The <sup>13</sup>C NMR spectrum of 2.

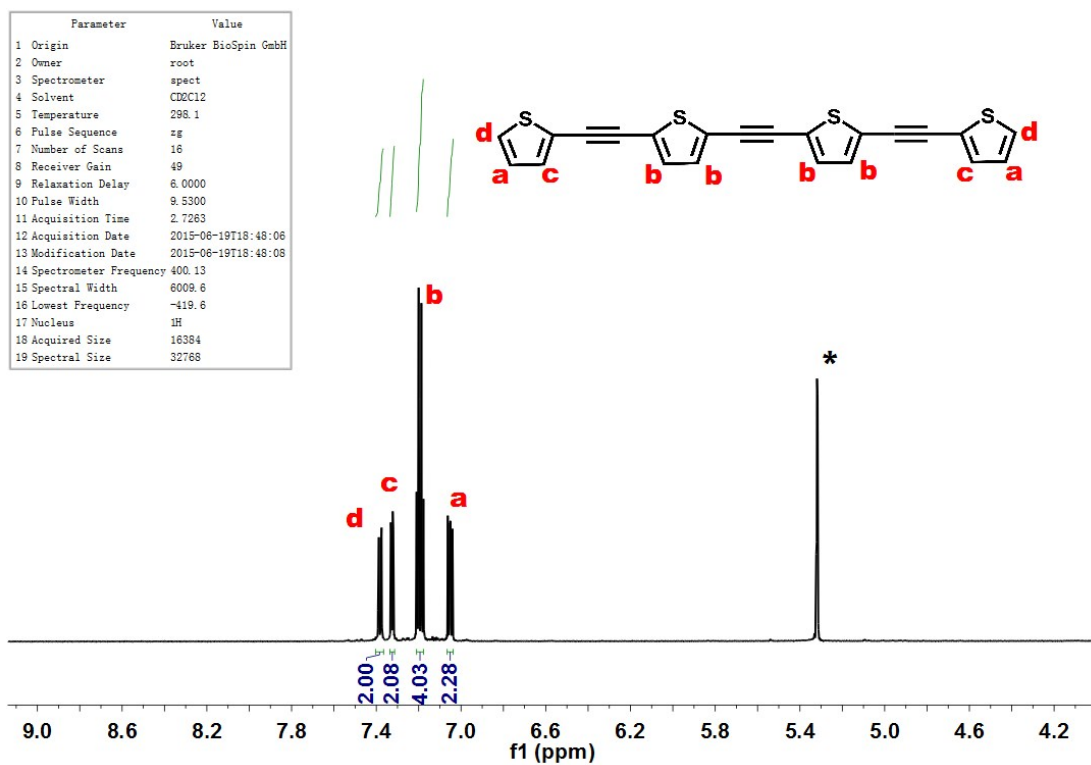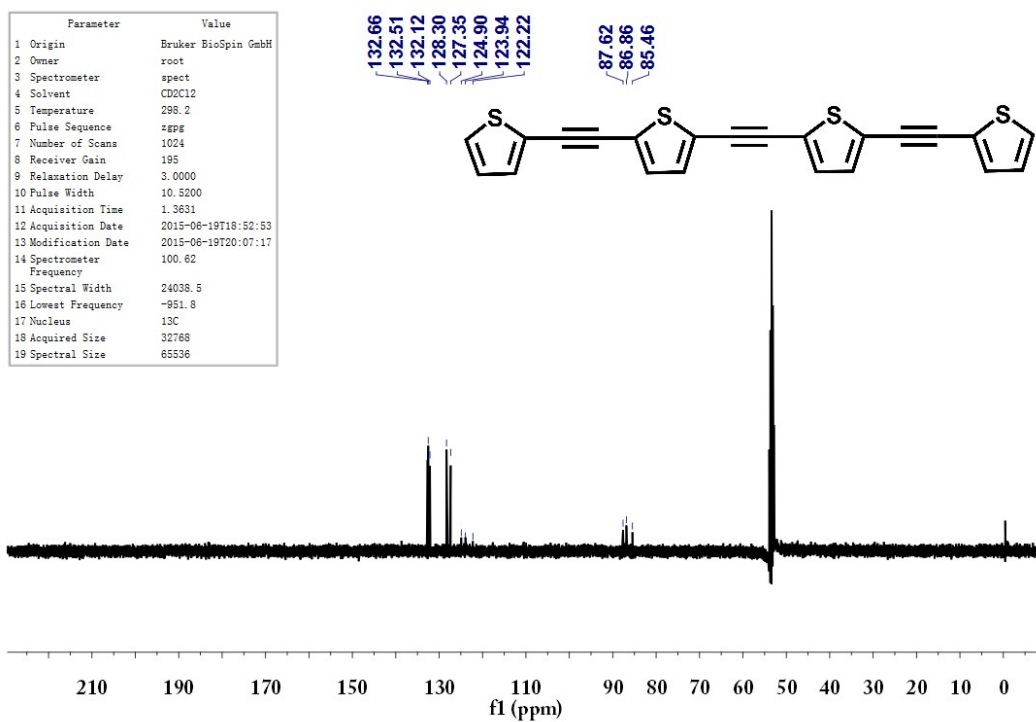

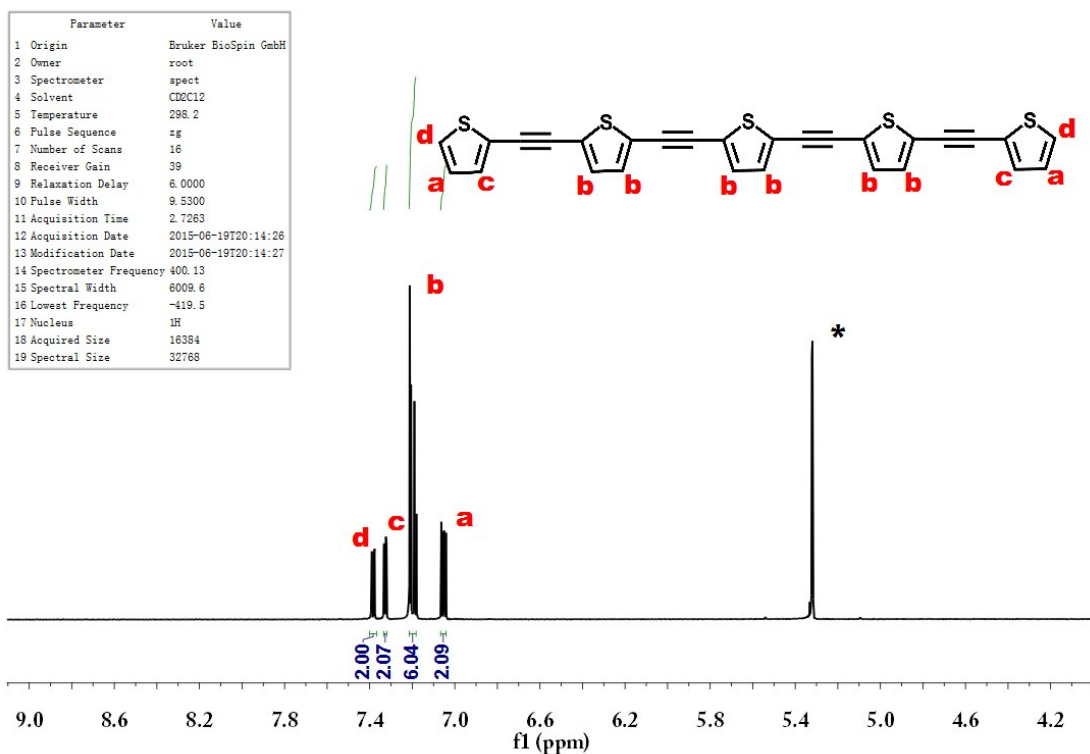

Fig. S7 The <sup>1</sup>H NMR spectrum of 4.

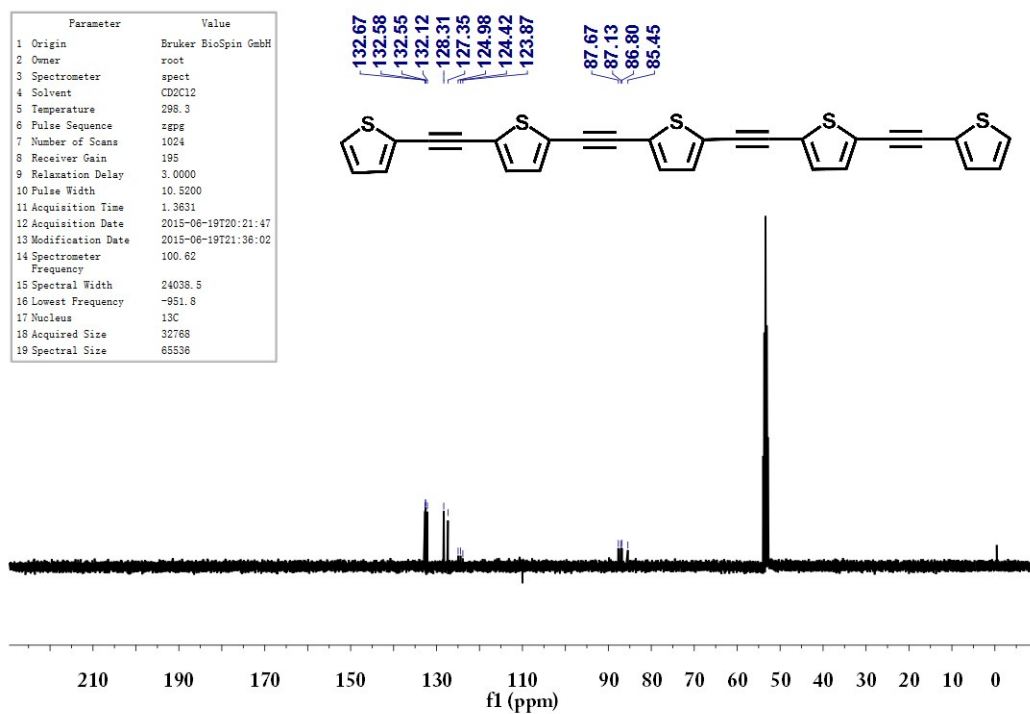

Fig. S8 The <sup>13</sup>C NMR spectrum of 4.

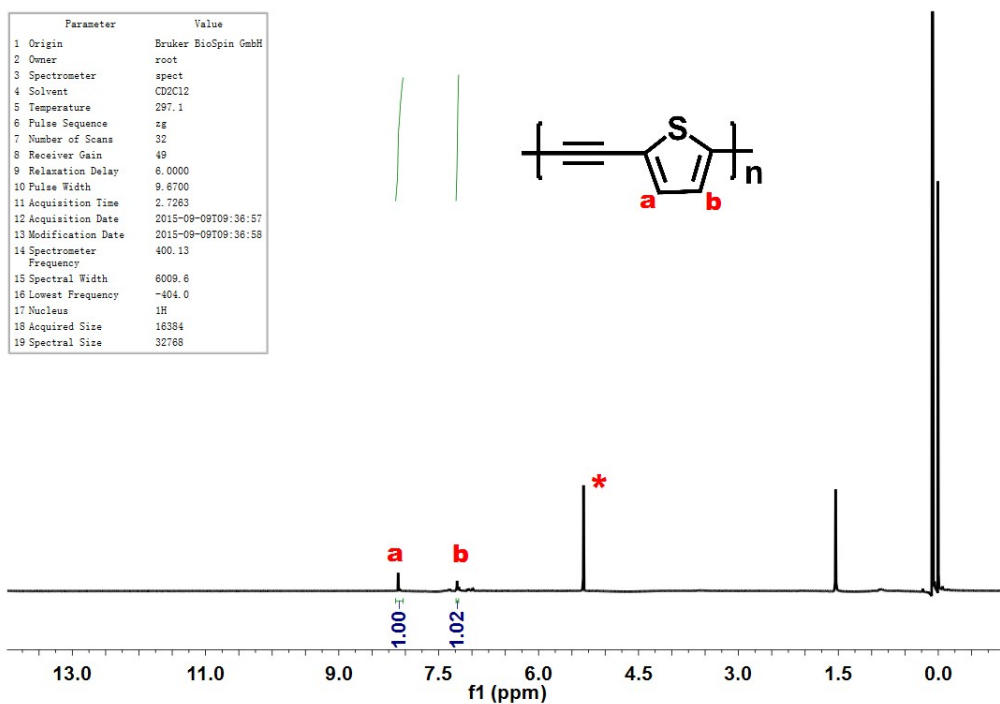

Fig. S9 The  $^1\text{H}$  NMR spectrum of PTE

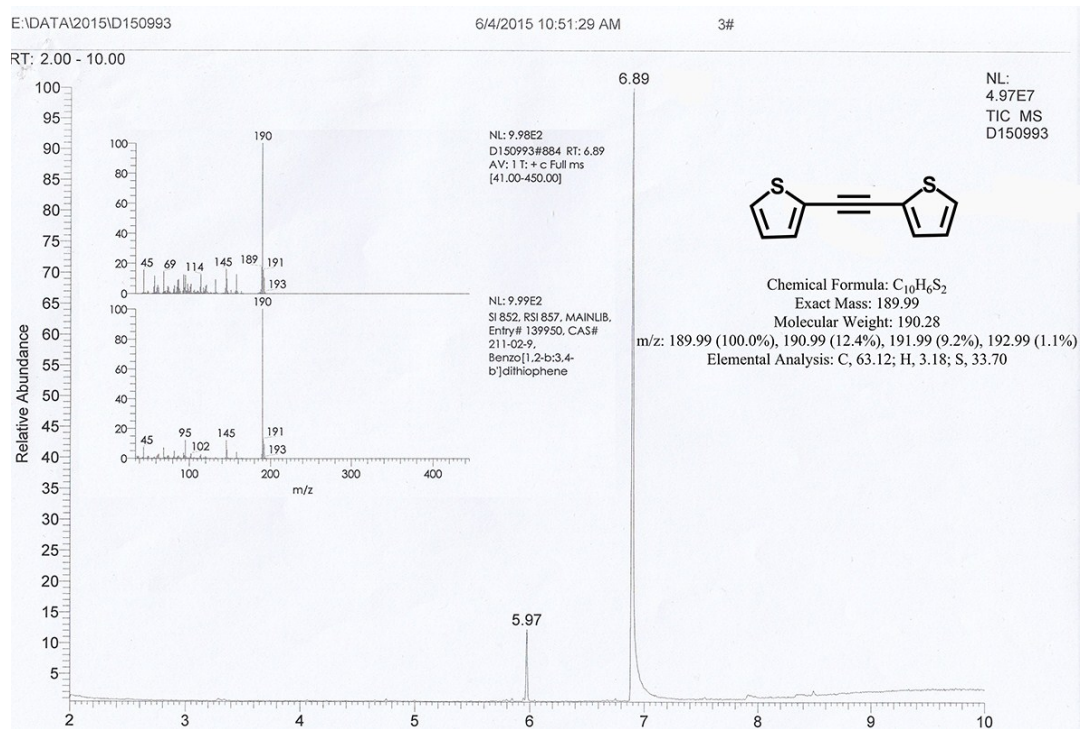

Fig. S10 The MALDI-TOF of 1.

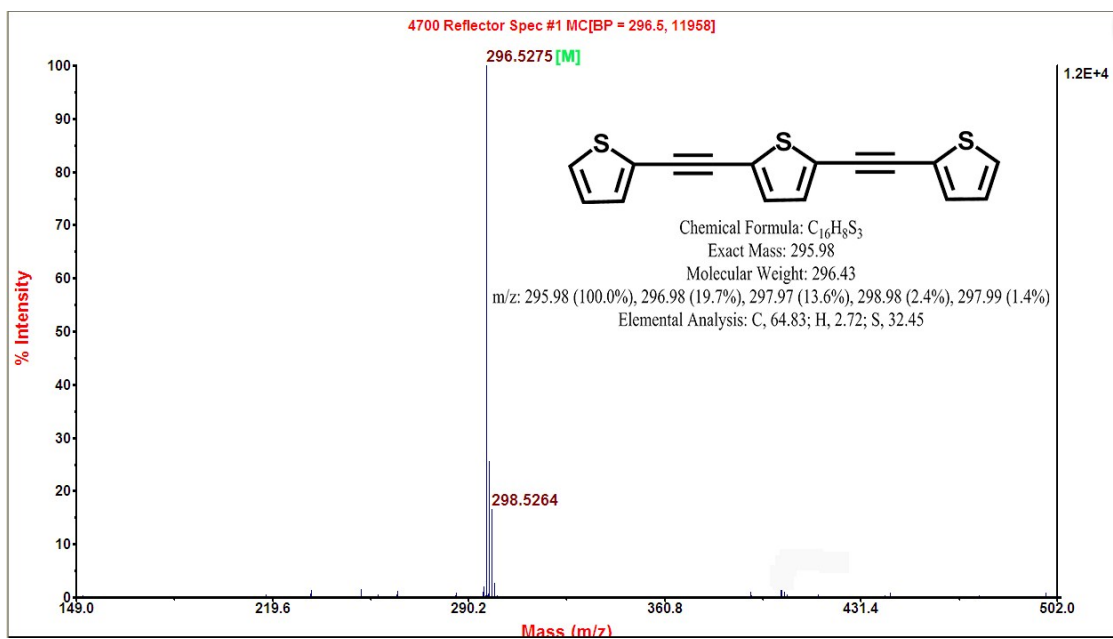

Fig. S11 The MALDI-TOF of 2.

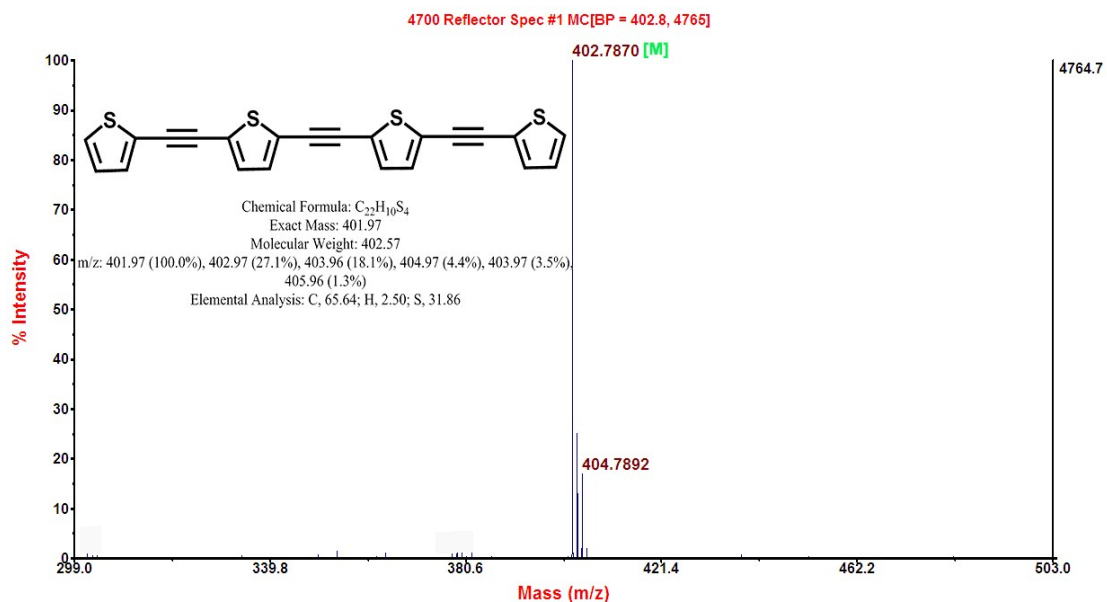

Fig. S12 The MALDI-TOF of 3.



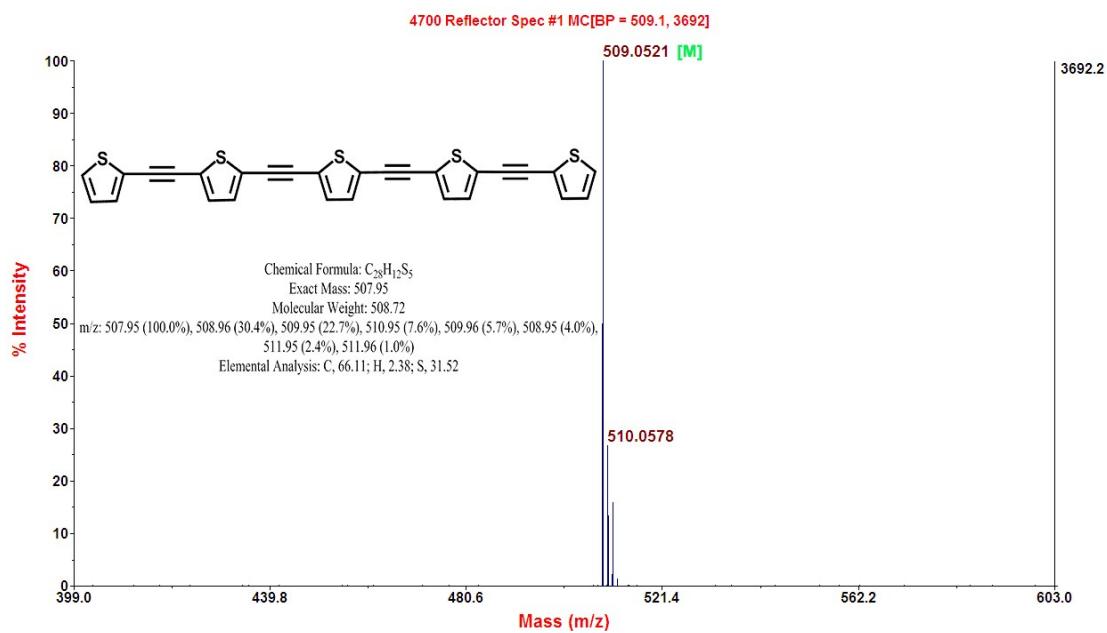

Fig. S13 The MALDI-TOF of 4.

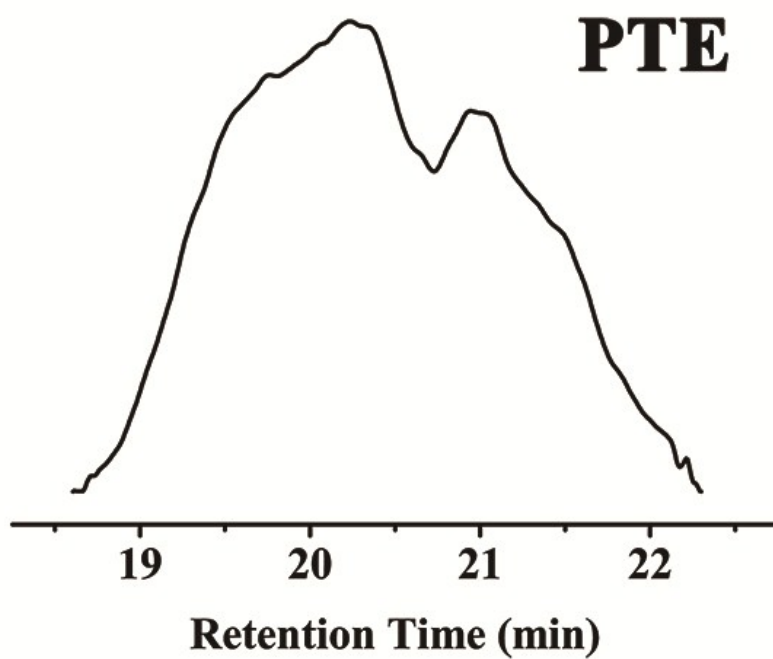

Fig. S14 The GPC data of PTE.

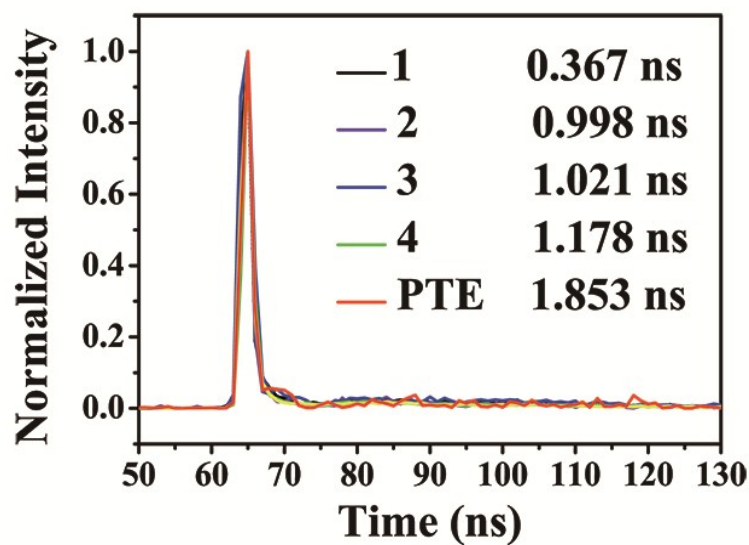

Fig. S15 The fluorescence lifetime of 1-4 and PTE in  $\text{CH}_2\text{Cl}_2$  solutions.

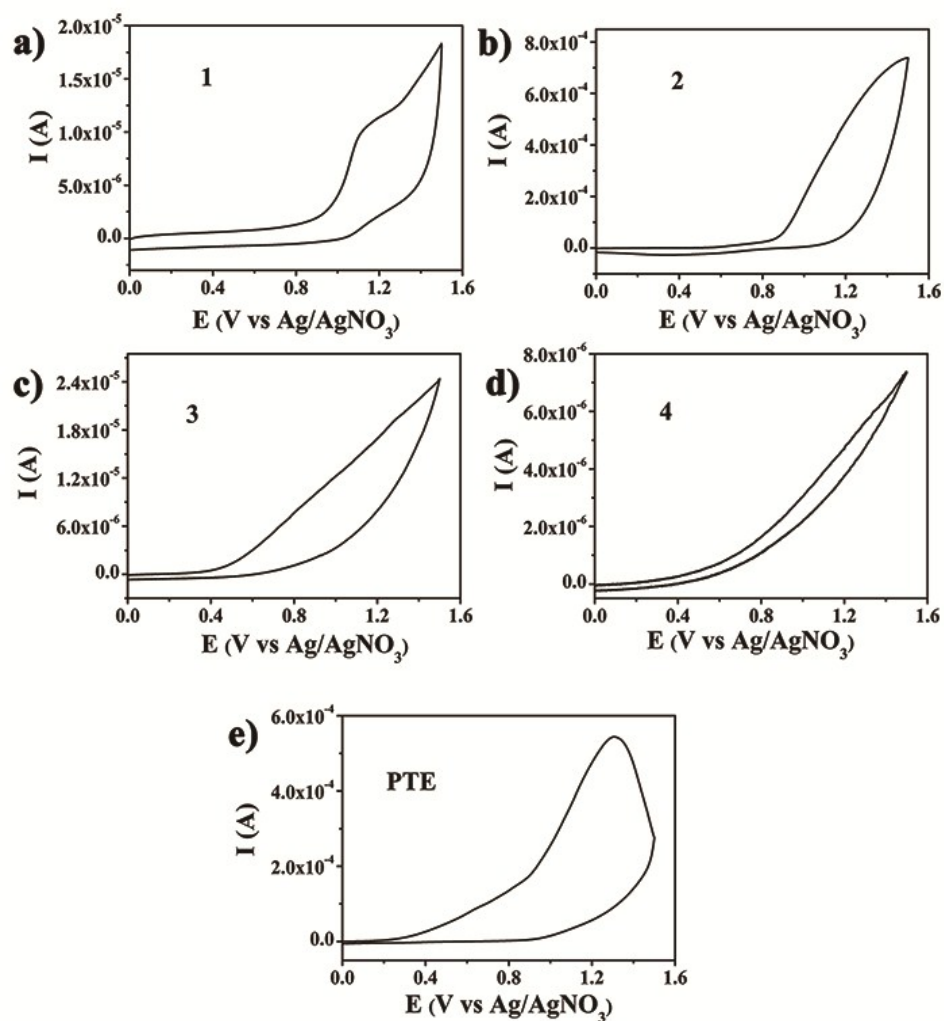

Fig. S16 The CV curves of (a) 1, (b) 2, (c) 3, (d) 4 and (e) PTE in  $\text{CH}_2\text{Cl}_2$  solution.

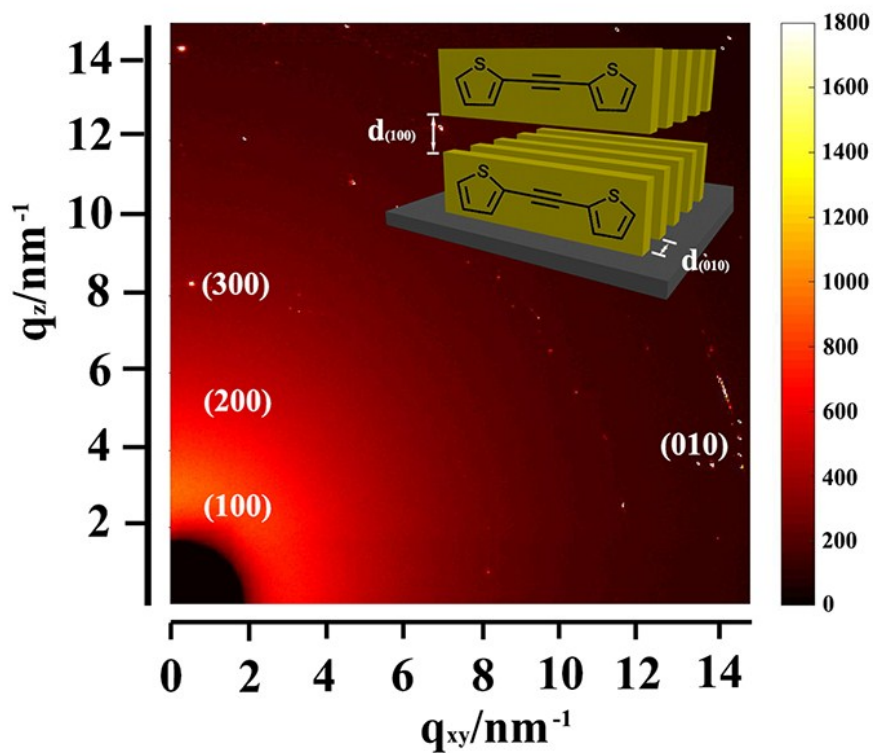

**Fig. S17** The 2D-GIXRD patterns of 1. The inserted model is a schematic diagram of the orientations of the aggregation structure with respect to the substrate in the films.

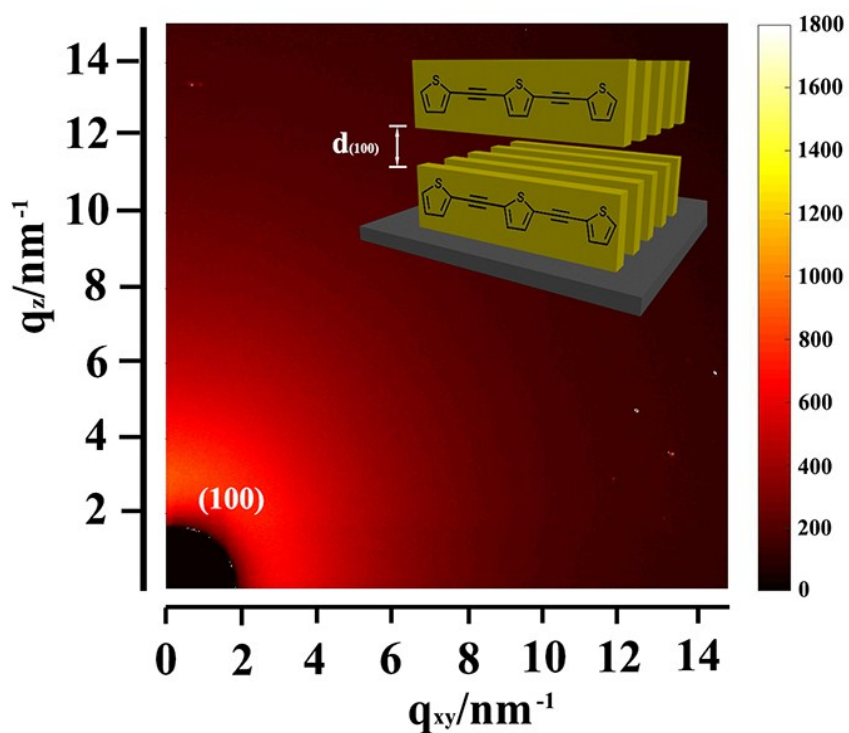

**Fig. S18** The 2D-GIXRD patterns of 2. The inserted model is a schematic diagram of the orientations of the aggregation structure with respect to the substrate in the films.

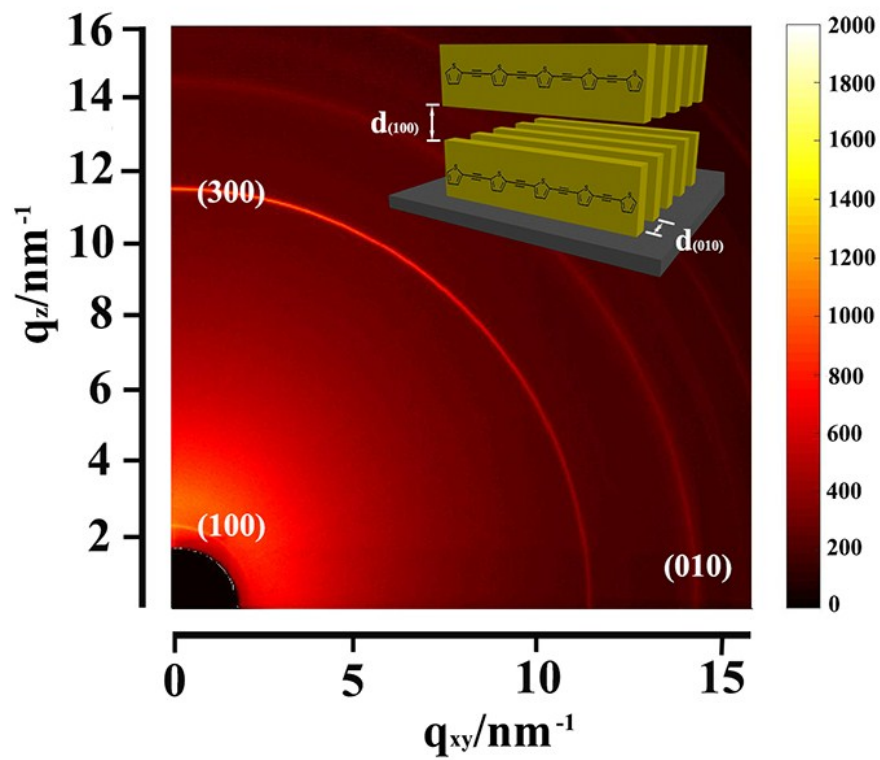

**Fig. S19** The 2D-GIXRD patterns of 4. The inserted model is a schematic diagram of the orientations of the aggregation structure with respect to the substrate in the films.

### The detailed calculated procedures for the charge carrier mobility.

According to the obtained  $V_{th}$  values and the metal-oxide semiconductor FET formula for the saturation regime,  $I_{DS} = \frac{\mu WC_i}{2L} (V_G - V_{th})^2$ , the calculations of the charge carrier mobility ( $\mu$ ) are below:

**3**

$$I_{DS} = 30.79 \times 10^{-6} \text{ A}, V_G = -6.69 \text{ V}, V_{DS} = 1 \text{ V}, C_i = 20 \text{ } \mu\text{F/cm}^2, W = 1 \text{ mm}, L = 1 \text{ mm}, V_{th} = -1.81 \text{ V}$$

$$\begin{aligned} \mu &= 2LI_{DS} / [WC_i(V_G - V_{th})^2] = 2I_{DS} / [C_i(V_G - V_{th})^2] \\ &= 2 \times 30.79 \times 10^{-7} / [20 \times 10^{-6} \times (-6.69 + 1.81)^2] \\ &= 0.13 \text{ cm}^2 \text{V}^{-1} \text{S}^{-1} \end{aligned}$$

**4**

$$I_{DS} = 35.93 \times 10^{-6} \text{ A}, V_G = -6.23 \text{ V}, V_{DS} = 1 \text{ V}, C_i = 20 \text{ } \mu\text{F/cm}^2, W = 1 \text{ mm}, L = 1 \text{ mm}, V_{th} = -2.14 \text{ V}$$

$$\begin{aligned} \mu &= 2LI_{DS} / [WC_i(V_G - V_{th})^2] = 2I_{DS} / [C_i(V_G - V_{th})^2] \\ &= 2 \times 35.93 \times 10^{-7} / [20 \times 10^{-6} \times (-6.23 + 2.14)^2] \\ &= 0.22 \text{ cm}^2 \text{V}^{-1} \text{S}^{-1} \end{aligned}$$

**PTE**

$$I_{DS} = 39.27 \times 10^{-6} \text{ A}, V_G = -5.27 \text{ V}, V_{DS} = 1 \text{ V}, C_i = 20 \text{ } \mu\text{F/cm}^2, W = 1 \text{ mm}, L = 1 \text{ mm}, V_{th} = -2.22 \text{ V}$$

$$\begin{aligned} \mu &= 2LI_{DS} / [WC_i(V_G - V_{th})^2] = 2I_{DS} / [C_i(V_G - V_{th})^2] \\ &= 2 \times 39.27 \times 10^{-7} / [20 \times 10^{-6} \times (-5.27 + 2.22)^2] \\ &= 0.42 \text{ cm}^2 \text{V}^{-1} \text{S}^{-1} \end{aligned}$$

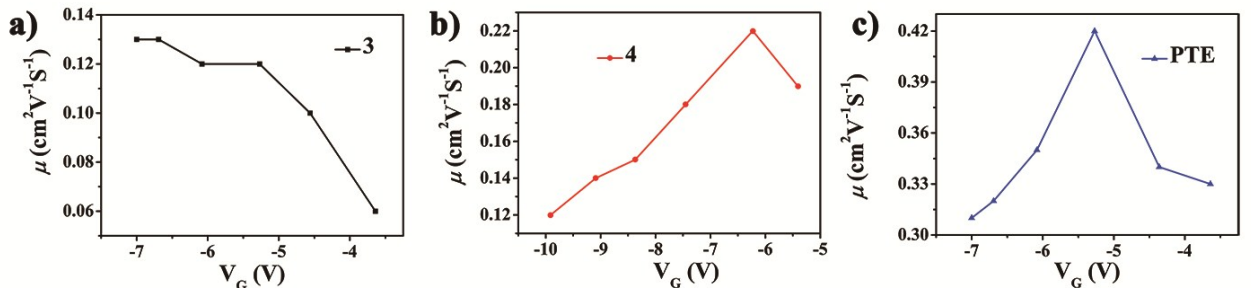

**Fig. S20** The mobility plots versus gate voltages for (a) 3, (b) 4 and (c) PTE.
